# Supplementary material
Source: publisher site journal article supplement (https://www.dovepress.com/article/314826)
Supplement: Supplementary file 1 [file get_supplementary_file.php]

## Supplementary tables

**Table S1 – Centers' characteristics – data obtained from the pre-study survey (n=15)**

|                                                                        |         |           |
|------------------------------------------------------------------------|---------|-----------|
| <b>Is there an outpatient consultation exclusive to HMV?</b>           | Yes     | 12 (80%)  |
|                                                                        | No      | 3 (20%)   |
| <b>Number of weekly hours dedicated to HMV outpatient consultation</b> | <5      | 4 (33.3%) |
|                                                                        | 5-10    | 4 (33.3%) |
|                                                                        | >10     | 4 (33.3%) |
| <b>Number of patients on HMV in the previous year</b>                  | <50     | 1 (6.7%)  |
|                                                                        | 50-100  | 5 (33.3%) |
|                                                                        | 100-200 | 5 (33.3%) |
|                                                                        | >200    | 4 (26.7%) |
| <b>Percentage of patients on HMV for obstructive disease</b>           | <25%    | 1 (6.7%)  |
|                                                                        | 25-50%  | 8 (53.3%) |
|                                                                        | > 50%   | 6 (40%)   |

Notes: These centers are located in 5 different Nomenclature of territorial units for statistics (NUTS) II regions (out of the 7 NUTS regions in Portugal): *Norte* [6 centers], *Centro* [3], *Área Metropolitana de Lisboa* [4], *Alentejo* [1] and *Região Autónoma dos Açores* [1].

**Table S2 - Comparison of patients' clinical and ventilatory characteristics related to smoking status.**

| <b>Smoking status (n=568)</b> | <b>Never smokers (n=97)</b> | <b>Ever smokers (n=471)</b> |          |
|-------------------------------|-----------------------------|-----------------------------|----------|
| Age (years)                   | 79 [73-85]                  | 70 [63-77]                  | p<0.001* |
| BMI (kg/m <sup>2</sup> )      | 32.0 [27.0-37.0]            | 28.0 [24.0-33.0]            | p<0.001* |
| FEV1 (% predicted)            | 48.0 [37.0-58.0]            | 36.0 [28.0-51.0]            | p<0.001* |
| FEV1/FVC                      | 0.60 [0.51-0.65]            | 0.51 [0.37-0.61]            | p<0.001* |
| IPAP (cmH <sub>2</sub> O)     | 20.0 [18.0-23.0]            | 18.0 [16.0-22.0]            | p=0.006* |
| EPAP (cmH <sub>2</sub> O)     | 7.0 [6.0-8.0]               | 6.0 [6.0-8.0]               | p=0.022* |
| Months on HMV                 | 28.0 [15.0-48.0]            | 26.0 [13.0-58.0]            | p=0.3    |
| Ventilator usage (h/d)        | 8.0 [7.0-10.0]              | 8.0 [7.0-10.0]              | p=0.3    |
| paCO <sub>2</sub> (mmHg)      | 45.0 [43.0-48.0]            | 45.0 [42.0-51.0]            | p=0.4    |
| HCO <sub>3</sub> (mmHg)       | 29.0 [27.0-31.0]            | 28.0 [26.1-31.0]            | p=0.08   |

**Abbreviations:** BMI, body mass index; FVC, forced vital capacity; FEV1, forced expiratory volume in one second; IPAP – inspiratory positive airway pressure; EPAP – expiratory positive airway pressure; HMV – home mechanical ventilation; PaCO<sub>2</sub> – arterial partial pressure of carbon dioxide; HCO<sub>3</sub> - serum bicarbonate.

All data presented as median and 1<sup>st</sup> and 3<sup>rd</sup> quartiles. Mann-Whitney tests were used to compare distributions between two groups

\* Statistically significant difference (p<0.05)

**Table S3 - Comparison of patients' clinical and ventilatory characteristics in relation to body mass index categories**

| Body mass index (n=568)   | BMI≥30 kg/m <sup>2</sup> (n=245) | BMI<30 kg/m <sup>2</sup> (n=323) |          |
|---------------------------|----------------------------------|----------------------------------|----------|
| Age (years)               | 71.0 [64.0-79.0]                 | 72.0 [65.0-79.0]                 | P=0.3    |
| FEV1 (% predicted)        | 49.5 [36.0-60.0]                 | 34.0 [26.0-45.0]                 | p<0.001* |
| FEV1/FVC                  | 0.58 [0.47 vs 0.64]              | 0.46 [0.35-0.60]                 | p<0.001* |
| IPAP (cmH <sub>2</sub> O) | 18.0 [16.0-23.0]                 | 20.0 [16.0-22.0]                 | p=0.35   |
| EPAP (cmH <sub>2</sub> O) | 8.0 [6.0-9.0]                    | 6.0 [6.0-8.0]                    | p<0.001* |
| PS (cmH <sub>2</sub> O)   | 11.0 [9.0-14.0]                  | 12.0 [10.0-16.0]                 | p<0.001* |
| Months on HMV             | 33.0 [15.0-63.0]                 | 24.0 [12.0-47.0]                 | p=0.001* |
| Ventilator usage (h/d)    | 8.0 [7.0-10.0]                   | 8.0 [7.0-10.0]                   | p=0.05   |
| PaCO <sub>2</sub> (mmHg)  | 44.0 [41.0-48.0]                 | 47.0 [43.0-51.0]                 | p<0.001* |
| HCO <sub>3</sub> (mmHg)   | 28.0 [26.0-30.0]                 | 29.0 [27.0-32.0]                 | p<0.001* |

**Abbreviations:** BMI, body mass index; FVC, forced vital capacity; FEV1, forced expiratory volume in one second; IPAP – inspiratory positive airway pressure; EPAP – expiratory positive airway pressure; PS – pressure support; HMV – home mechanical ventilation; PaCO<sub>2</sub> – arterial partial pressure of carbon dioxide; HCO<sub>3</sub> - serum bicarbonate.

All data presented as median and 1<sup>st</sup> and 3<sup>rd</sup> quartiles. Mann-Whitney tests were used to compare distributions between two groups

\* Statistically significant difference (p<0.05)

**Table S4 - Comparison of patients' clinical and ventilatory characteristics in relation to sleep apnea**

| Sleep apnea (n=373)       | Moderate to severe OSA (AHI≥15 events/hour) (n=172) | No or mild OSA (AHI<15 events/hour) (n=201) |          |
|---------------------------|-----------------------------------------------------|---------------------------------------------|----------|
| Age (years)               | 71.0 [65.0-78.0]                                    | 72.0 [64.0-79.0]                            | p=0.3    |
| BMI (kg/m <sup>2</sup> )  | 33.0 [29.0-38.0]                                    | 27.0 [23.0-31.0]                            | p<0.001* |
| FEV1 (% predicted)        | 53.0 [41.0-62.5]                                    | 34.0 [28.0-48.0]                            | p<0.001* |
| FEV1/FVC                  | 0.60 [0.48-0.65]                                    | 0.51 [0.37-0.60]                            | p<0.001* |
| IPAP (cmH <sub>2</sub> O) | 18.0 [16.0-22.0]                                    | 20.0 [16.0-22.0]                            | p=0.006* |
| EPAP (cmH <sub>2</sub> O) | 8.0 [6.0-9.0]                                       | 6.0 [6.0-8.0]                               | p<0.001* |
| Months on HMV             | 29.5 [14.0-63.5]                                    | 32.0 [15.0-60.0]                            | p=0.5    |
| Ventilator usage (h/d)    | 8.0 [6.0-9.0]                                       | 8.0 [7.0-9.0]                               | p=0.16   |
| PaCO <sub>2</sub> (mmHg)  | 43.0 [39.0-48.0]                                    | 46.0 [43.0-51.0]                            | p<0.001* |
| HCO <sub>3</sub> (mmHg)   | 28.0 [26.0-29.0]                                    | 28.0 [27.0-32.0]                            | p<0.001* |

**Abbreviations:** BMI, body mass index; FVC, forced vital capacity; FEV1, forced expiratory volume in one second; IPAP – inspiratory positive airway pressure; EPAP – expiratory positive airway pressure; HMV – home mechanical ventilation; PaCO<sub>2</sub> – arterial partial pressure of carbon dioxide; HCO<sub>3</sub> - serum bicarbonate; OSA – obstructive sleep apnea; AHI - Apnea Hypopnea Index.

All data presented as median and 1<sup>st</sup> and 3<sup>rd</sup> quartiles. Mann-Whitney tests were used to compare distributions between two groups

\* Statistically significant difference (p<0.05)

**Table S5 - Comparison of patients' clinical and ventilatory characteristics in relation to duration of HMV**

| Duration of HMV (n=569)   | >6 months (n=509) | ≤6 months (n=60) |          |
|---------------------------|-------------------|------------------|----------|
| Age (years)               | 72.0 [65.0-79.0]  | 70.0 [63.0-79.0] | p=0.14   |
| BMI (kg/m <sup>2</sup> )  | 28.0 [24.0-33.0]  | 29.0 [24.0-32.0] | p=0.40   |
| FEV1 (% predicted)        | 38.0 [28.0-53.0]  | 44.5 [33.0-51.0] | p=0.10   |
| FEV1/FVC                  | 0.53 [0.38-0.62]  | 0.51 [0.43-0.61] | p=0.45   |
| IPAP (cmH <sub>2</sub> O) | 20.0 [16.0-22.0]  | 17.5 [16.0-20.0] | p<0.001* |
| EPAP (cmH <sub>2</sub> O) | 7.0 [6.0-8.0]     | 6.0 [5.0-7.0]    | p<0.001* |
| BURR (cpm)                | 15 [14-16]        | 15 [14-16]       | p=0.20   |
| Ventilator usage (h/d)    | 8.0 [7.0-10.0]    | 7.0 [4.5-8.0]    | p<0.001* |
| PaCO <sub>2</sub> (mmHg)  | 45.0 [42.0-50.0]  | 48.0 [43.3-52.2] | p=0.03*  |
| HCO <sub>3</sub> (mmHg)   | 28.0 [26.9-31.0]  | 29.0 [28.0-32.0] | p=0.02*  |

**Abbreviations:** BMI, body mass index; FVC, forced vital capacity; FEV1, forced expiratory volume in one second; IPAP – inspiratory positive airway pressure; EPAP – expiratory positive airway pressure; BURR – backup respiratory rate; HMV – home mechanical ventilation; PaCO<sub>2</sub> – arterial partial pressure of carbon dioxide; HCO<sub>3</sub> - serum bicarbonate.

All data presented as median and 1<sup>st</sup> and 3<sup>rd</sup> quartiles. Mann-Whitney tests were used to compare distributions between two groups

\* Statistically significant difference (p<0.05)

**Table S6 - Comparison of patients' clinical and ventilatory characteristics in relation to ventilator pressures**

| Ventilator Pressures (n=569)       | IPAP ≥20 cmH <sub>2</sub> O (n=277) | IPAP <20 cmH <sub>2</sub> O (n=292) |          |
|------------------------------------|-------------------------------------|-------------------------------------|----------|
| Age (years)                        | 72.0 [65.0-78.0]                    | 71.5 [64.0-79.0]                    | p=0.4    |
| BMI (kg/m <sup>2</sup> )           | 28.0 [24.0-34.0]                    | 29.0 [24.0-33.0]                    | p=0.4    |
| FEV1 (% predicted)                 | 34.0 [26.0-48.0]                    | 44.0 [33.0-56.0]                    | p<0.001* |
| FEV1/FVC                           | 0.47 [0.36-0.59]                    | 0.58 [0.45-0.64]                    | p<0.001* |
| Months on HMV                      | 36.0 [15.0-72.0]                    | 21.5 [12.0-39.5]                    | p<0.001* |
| Ventilator usage (h/d)             | 8.0 [7.0-10.0]                      | 8.0 [6.2-9.0]                       | p<0.001* |
| PaCO <sub>2</sub> (mmHg)           | 47.0 [44.0-52.0]                    | 44.0 [41.0-48.0]                    | p<0.001* |
| HCO <sub>3</sub> (mmHg)            | 29.0 [27.1-31.0]                    | 28.0 [26.0-31.0]                    | p=0.002* |
| Exacerbations in the previous year | 0 [0-1]                             | 1 [0-2]                             | p=0.01*  |

**Abbreviations:** BMI, body mass index; FVC, forced vital capacity; FEV1, forced expiratory volume in one second; IPAP – inspiratory positive airway pressure; HMV – home mechanical ventilation; PaCO<sub>2</sub> – arterial partial pressure of carbon dioxide; HCO<sub>3</sub> - serum bicarbonate.

All data presented as median and 1<sup>st</sup> and 3<sup>rd</sup> quartiles. Mann-Whitney tests were used to compare distributions between two groups

\* Statistically significant difference (p<0.05)
